# Supplementary material for: SPAG9 Expression Predicts Good Prognosis in Patients with Clear-Cell Renal Cell Carcinoma: A Bioinformatics Analysis with Experimental Validation
Source: MDPI journal article supplement (doi:10.3390/genes14040944), 2023-04-20
Supplement: s1 [file s1]

**Table S1.** Baseline clinical characteristics of ccRCC patients from the TCGA database. Data was presented as number (percentage) or mean  $\pm$  SD.

| Total patients (n=515) |             |
|------------------------|-------------|
| Age (years)            | 60 $\pm$ 12 |
| Gender (male)          | 336 (65%)   |
| Grade                  |             |
| 1                      | 13 (3%)     |
| 2                      | 224 (43%)   |
| 3                      | 205 (40%)   |
| 4                      | 73 (14%)    |
| Stage                  |             |
| I                      | 257 (50%)   |
| II                     | 54 (10%)    |
| III                    | 122 (24%)   |
| IV                     | 82 (16%)    |
| fustat (alive)         | 346 (67%)   |
| futime (years)         | 4 $\pm$ 3   |

**Table S2.** Baseline clinical characteristics of ccRCC patients from the ICGC database. Data was presented as number (percentage) or mean  $\pm$  SD.

| Total patients (n=91) |             |
|-----------------------|-------------|
| Age (years)           | 60 $\pm$ 10 |
| Gender (male)         | 52 (57%)    |
| fustat (alive)        | 61 (67%)    |
| futime (years)        | 4 $\pm$ 2   |

**Table S3.** Primers designed for this study.

| Genes                     | Forward sequence              | Reverse sequence           |
|---------------------------|-------------------------------|----------------------------|
| <i>GAPDH</i>              | TGACATCAAGAAGGTGGTGAA<br>GCAG | GTGTCGCTGTTGAAGTCAGAGGAG   |
| <i>SPAG9</i>              | GCTGTGGTGTGCTGTTGGAGTC        | TCGCTGTTTACTGCCTTCTGTATCC  |
| <i>MAP1LC3B</i><br>(LC3B) | GTCAGCGTCTCCACACCAATCT<br>C   | ACAATTTTCATCCCGAACGTCTCCTG |
| <i>BECN1</i><br>(Beclin1) | AGGCATGGAGGGGTCTAAGG          | AATGGCTCCTGTGAGTTCCTG      |
| <i>SQSTM1</i><br>(p62)    | GATAGCCTTGGAGTCGGTGG          | TCAGCCTCTGTAGATGGGTCC      |

**Table S4.** The qPCR data after analysis with  $2^{-\Delta\Delta Ct}$  method.

Figure 3A (786-O cells):

Overexpression of *SPAG9*:

| Control     | Ov-NC       | Ov-SPAG9    |
|-------------|-------------|-------------|
| 1.098092814 | 1.218410264 | 1.898684242 |
| 1.04608494  | 1.017479692 | 2.505328877 |
| 1.098092814 | 1.113421618 | 2.470837274 |
| 0.781869643 | 1.07549439  | 2.006943497 |
| 1.031683179 | 0.837987135 | 2.611719574 |
| 0.982820599 | 1.060687741 | 2.453769955 |

*MAP1LC3B* expression in 786-O cells:

| Ov-NC       | Ov-SPAG9    |
|-------------|-------------|
| 0.958156574 | 1.482809572 |
| 1.093030254 | 1.775632885 |
| 1.273089047 | 1.589235949 |
| 1.019833287 | 1.383510251 |
| 0.828362031 | 1.327151742 |
| 0.887816443 | 1.336382813 |

*BECN1* expression in 786-O cells:

| Ov-NC       | Ov-SPAG9    |
|-------------|-------------|
| 0.967052867 | 3.098707688 |
| 1.110852038 | 3.84149178  |
| 1.445598252 | 3.634272673 |
| 0.896059642 | 3.141964035 |
| 0.727826591 | 2.516932745 |
| 0.987372704 | 2.191117219 |

*SQSTM1* expression in 786-O cells:

| Ov-NC       | Ov-SPAG9    |
|-------------|-------------|
| 0.796456055 | 9.010871634 |
| 0.90229223  | 14.94578394 |
| 0.841868418 | 13.46989469 |
| 1.015131529 | 14.74002092 |
| 1.538651675 | 9.073547203 |
| 1.058239861 | 9.724787103 |

Figure 3B (HTB-9 cells):

Overexpression of *SPAG9*:

| Control     | Ov-NC     | Ov-SPAG9    |
|-------------|-----------|-------------|
| 0.820741609 | 0.7888329 | 3.041957506 |
| 0.885767519 | 0.7237016 | 2.918040688 |
| 0.942784536 | 1.110741  | 4.184339759 |
| 1.244011653 | 1.0948551 | 3.986161051 |
| 1.28788163  | 0.7795067 | 2.648177821 |
| 0.910669834 | 1.282356  | 3.1058755   |

*MAP1LC3B* expression in HTB-9 cells:

| Ov-NC       | Ov-SPAG9    |
|-------------|-------------|
| 1.406068292 | 1.110852038 |
| 0.967052867 | 0.68380964  |
| 0.927659117 | 0.764011716 |
| 0.927659117 | 0.748288582 |
| 0.960372945 | 1.001155913 |
| 0.889870106 | 0.859557863 |

*BECN1* expression in HTB-9 cells:

| Ov-NC       | Ov-SPAG9    |
|-------------|-------------|
| 1.620755722 | 1.84889932  |
| 0.502315837 | 1.032875715 |
| 1.122462048 | 1.228303149 |
| 1.107008782 | 0.676736762 |
| 1.245449622 | 1.522736872 |
| 0.793700526 | 1.391524844 |

*SQSTM1* expression in HTB-9 cells:

| Ov-NC       | Ov-SPAG9    |
|-------------|-------------|
| 0.96761162  | 0.571371111 |
| 0.87812608  | 0.364123561 |
| 1.081100018 | 0.289673577 |
| 1.088619663 | 0.376964351 |
|             | 0.464097554 |
|             | 0.364123561 |

Figure 7 (786-O cells):

*MAP1LC3B* expression in 786-O cells:

| Ov-NC       | Ov-SPAG9    | Ov-SPAG9+740Y-P |
|-------------|-------------|-----------------|
| 0.958156574 | 1.482809572 | 3.526735386     |
| 1.093030254 | 1.775632885 | 3.651105441     |
| 1.273089047 | 1.589235949 | 3.859284319     |
| 1.019833287 | 1.383510251 | 3.383070715     |
| 0.828362031 | 1.327151742 | 3.313448126     |
| 0.887816443 | 1.336382813 | 3.779861397     |

*BECN1* expression in 786-O cells:

| Ov-NC       | Ov-SPAG9    | Ov-SPAG9+740Y-P |
|-------------|-------------|-----------------|
| 0.967052867 | 3.098707688 | 6.505530315     |
| 1.110852038 | 3.84149178  | 6.240521808     |
| 1.445598252 | 3.634272673 | 6.550779856     |
| 0.896059642 | 3.141964035 | 6.28392807      |
| 0.727826591 | 2.516932745 | 6.924292488     |
| 0.987372704 | 2.191117219 |                 |

*SQSTM1* expression in 786-O cells:

| Ov-NC       | Ov-SPAG9    | Ov-SPAG9+740Y-P |
|-------------|-------------|-----------------|
| 0.796456055 | 9.010871634 | 57.74670269     |
| 0.90229223  | 14.94578394 | 64.96841783     |
| 0.841868418 | 13.46989469 | 56.55829274     |
| 1.015131529 | 14.74002092 | 49.92417446     |
| 1.538651675 | 9.073547203 | 52.40623885     |
| 1.058239861 | 9.724787103 | 53.13780268     |

**Table S5.** The role of *SPAG9* in different tumor cell lines

| The role of <i>SPAG9</i> | Cancer type                                | Cell lines used in the study                                                     | References  |
|--------------------------|--------------------------------------------|----------------------------------------------------------------------------------|-------------|
| Promoting proliferation  | Hepatocellular carcinoma                   | HepG2 cells [16];<br>QGY cells [15]                                              | [15-16]     |
|                          | Ovarian cancer                             | A10, SKOV-3 and Caov3 cells [13];<br>SKOV3-ip, COV362, OVCAR4 and ES-2 cells [9] | [9, 13]     |
|                          | Gastric cancer                             | HGC-27 and SGC-7901 cells [8];                                                   | [8]         |
|                          | Osteosarcoma                               | U2OS cells [11]                                                                  | [11]        |
|                          | Prostate cancer                            | PC-3, DU145 and C4-2 cells [17];<br>HGC-27 cells and SGC-7901 cells [7]          | [7, 17]     |
|                          | <i>Bladder urothelial carcinoma (BLCA)</i> | <i>UM-UC-3 cells [6]</i>                                                         | [6]         |
|                          | <i>Clear cell renal carcinoma (ccRCC)</i>  | <i>Caki-1 and NII-AKS413 cells [4]</i>                                           | [4]         |
|                          | Colorectal Cancer                          | COLO 205 and HCT 116 cells [5]                                                   | [5]         |
|                          | Triple-negative breast cancer              | MDA-MB-231 cells [10]                                                            | [10]        |
| Promoting migration      | Hepatocellular carcinoma                   | QGY cells [15]                                                                   | [15]        |
|                          | Ovarian cancer                             | SKOV3-ip, COV362, OVCAR4 and ES-2 cells [9]                                      | [9]         |
|                          | Gastric cancer                             | HGC-27 and SGC-7901 cells [8]                                                    | [8]         |
|                          | Osteosarcoma                               | U2OS cells [11-12]                                                               | [11-12]     |
|                          | Prostate cancer                            | PC-3, DU145 and C4-2 cells [17];<br>HGC-27 cells and SGC-7901 cells [7]          | [7, 17]     |
|                          | <i>Bladder urothelial carcinoma (BLCA)</i> | <i>UM-UC-3 cells [6];<br/>T24 and 5637 cells [14]</i>                            | [6]<br>[14] |
|                          | <i>Clear cell renal carcinoma (ccRCC)</i>  | <i>Caki-1 and NII-AKS413 cells [4]</i>                                           | [4]         |
|                          | Colorectal Cancer                          | COLO 205 and HCT 116 cells [5]                                                   | [5]         |
|                          | Triple-negative breast cancer              | MDA-MB-231 cells [10]                                                            | [10]        |
| Promoting EMT            | Ovarian cancer                             | A10, SKOV-3 and Caov3 cells [13]                                                 | [13]        |
|                          | Triple-negative breast cancer              | MDA-MB-231 cells [10]                                                            | [10]        |
|                          | <i>Bladder urothelial carcinoma (BLCA)</i> | <i>T24 and 5637 cells [14]</i>                                                   | [14]        |

|                            |                               |                                  |         |
|----------------------------|-------------------------------|----------------------------------|---------|
| Promoting Angiogenesis     | Osteosarcoma.                 | U2OS cells [12]                  | [12]    |
| Inhibiting apoptosis       | Hepatocellular carcinoma      | HepG2 cells [16]                 | [16]    |
|                            | Ovarian cancer                | A10, SKOV-3 and Caov3 cells [13] | [13]    |
|                            | Triple-negative breast cancer | MDA-MB-231 cells [10]            | [10]    |
| <b>Promotion autophagy</b> | Cervical cancer               | HeLa cells [18-19]               | [18-19] |
|                            | Colorectal Cancer             | HCT-116 cells [18]               | [18]    |
|                            | Hepatocellular carcinoma      | HepG2 cells [18]                 | [18]    |
|                            | Glioma                        | U87 cells [19]                   | [19]    |
|                            | Fibrosarcoma                  | HT1080 cells [19]                | [19]    |

Studies with overexpression/knockdown of *SPAG9* in tumor cell lines were included. Studies in ccRCC and BLCA were marked in italics. Abbreviation: EMT, epithelial-mesenchymal transition.

**Table S6. The correlation between the activity scores of pathways and OS in ccRCC**

| Pathways                                  | Correlation analysis with OS in ccRCC |           |
|-------------------------------------------|---------------------------------------|-----------|
|                                           | R                                     | p value   |
|                                           | (Correlation coefficient)             |           |
| <i>Adipocytokine signaling pathway</i>    | 0.16                                  | <0.001*** |
| Dorso ventral axis formation              | 0.093                                 | 0.032*    |
| Endometrial cancer                        | 0.1                                   | 0.019*    |
| <i>ERBB signaling pathway</i>             | 0.11                                  | 0.013*    |
| <i>JAK-STAT signaling pathway</i>         | 0.11                                  | 0.0099**  |
| Lysine degradation                        | 0.083                                 | 0.055     |
| MTOR signaling pathway                    | 0.096                                 | 0.027*    |
| Natural killer cell-mediated cytotoxicity | 0.1                                   | 0.015*    |
| Neurotrophin signaling pathway            | 0.098                                 | 0.024*    |
| Non-small cell lung cancer                | 0.077                                 | 0.078     |

|                                       |          |        |
|---------------------------------------|----------|--------|
| Phosphatidylinositol signaling system | 0.052    | 0.23   |
| Small cell lung cancer                | 0.083    | 0.057  |
| T-cell receptor signaling pathway     | 0.09     | 0.039* |
| Alzheimers disease                    | 0.0072   | 0.87   |
| Cardiac muscle contraction            | 0.0018   | 0.97   |
| Huntingtons disease                   | 0.0017   | 0.97   |
| Oxidative phosphorylation             | 0.0018   | 0.97   |
| Parkinsons disease                    | -0.00077 | 0.99   |

The activity scores of the adipocytokine signaling pathway, ERBB signaling pathway and JAK-STAT signaling pathway were most strongly correlated with OS in ccRCC patients; these 3 pathways were marked in italics.

**Table S7. Workflow of screening key genes**

| Candidate genes | Correlation analysis with <i>SPAG9</i> expression |           | Kaplan–Meier survival analysis | Univariate Cox analysis |              |
|-----------------|---------------------------------------------------|-----------|--------------------------------|-------------------------|--------------|
|                 | p value < 0.05                                    |           | p value (log-rank) < 0.05      | HR < 0.71               |              |
|                 | R (Correlation coefficient)                       | p value   | p value (log-rank)             | HR                      | p value (HR) |
| <i>AKT3</i>     | 0.62                                              | <0.001*** | <0.001***                      | 0.698                   | <0.001***    |
| <i>CBL</i>      | 0.64                                              | <0.001*** | 0.0041**                       | 0.716                   | <0.001***    |
| <i>CBLB</i>     | 0.43                                              | <0.001*** | 0.87                           |                         |              |
| <i>JAK2</i>     | 0.51                                              | <0.001*** | 0.06                           |                         |              |
| <i>MAPK8</i>    | 0.77                                              | <0.001*** | <0.001***                      | 0.604                   | <0.001***    |
| <i>MTOR</i>     | 0.47                                              | <0.001*** | 0.23                           |                         |              |
| <i>PIK3CA</i>   | 0.68                                              | <0.001*** | <0.001***                      | 0.687                   | <0.001***    |

|                      |      |           |           |       |           |
|----------------------|------|-----------|-----------|-------|-----------|
| <i>PIK3CD</i>        | 0.24 | <0.001*** | 0.27      |       |           |
| <i>PIK3CG</i>        | 0.34 | <0.001*** | <0.001*** | 0.763 | <0.001*** |
| <i>PIK3R1</i>        | 0.44 | <0.001*** | <0.001*** | 0.741 | <0.001*** |
| <b><i>PIK3R3</i></b> | 0.46 | <0.001*** | <0.001*** | 0.610 | <0.001*** |
| <i>PTPN11</i>        | 0.63 | <0.001*** | 0.0011**  | 0.750 | 0.002**   |
| <b><i>SOS1</i></b>   | 0.74 | <0.001*** | <0.001*** | 0.708 | <0.001*** |
| <b><i>SOS2</i></b>   | 0.72 | <0.001*** | <0.001*** | 0.575 | <0.001*** |
| <i>STAT3</i>         | 0.62 | <0.001*** | 0.12      |       |           |
| <b><i>STAT5B</i></b> | 0.71 | <0.001*** | <0.001*** | 0.619 | <0.001*** |

---

The candidate genes listed in the first column were the common core enriched genes of the adipocytokine signaling pathway, ERBB signaling pathway and JAK-STAT signaling pathway, and the screening steps were listed in the first row with their conditions. Screening was carried out step by step. If one gene did not meet the conditions of a certain step, it would be excluded from the process. The first 2 steps were performed with GEPIA2. All analyses were carried in ccRCC samples. 7 key genes were ultimately screened out and were marked in bold.
